# Supplementary material for: Psychosocial well-being before, during and after the COVID-19 pandemic: a nationwide study of more than half a million Norwegian adolescents
Source: Research Square preprint supplement (doi:10.21203/rs.3.rs-2333214/v1), 2023-01-04
Supplement: Supplementary file 1 [file 2b22392b2d805a63af38c8f5.docx]

**Supplementary Table 1**

Results of societal growth curve analyses from 2014 to 2022 and estimated effects of the COVID-19 pandemic in 2021 (during the pandemic) and in 2022 (after the pandemic) for social relationship variables

|  | Peer relationships | | | |  | Parental relationships | | | |
| --- | --- | --- | --- | --- | --- | --- | --- | --- | --- |
|  | Estimate | 95% CI | *t* | *P* |  | Estimate | 95% CI | *t* | *P* |
| Intercept | 84.63 | 84.33; 84.92 | 558.96 | <0.001 |  | 85.70 | 85.40; 86.00 | 560.19 | <0.001 |
| Linear slope | -0.15 | -0.29; -0.01 | -2.04 | 0.042 |  | 0.27 | 0.13; 0.42 | 3.62 | <0.001 |
| Quadratic slope | 0.01 | -0.03; 0.05 | 0.62 | 0.532 |  | 0.02 | -0.02; 0.06 | 0.85 | 0.398 |
| Pandemic year 2021 | -0.54 | -1.16; 0.07 | -1.75 | 0.080 |  | -0.26 | -0.91; 0.38 | -0.79 | 0.428 |
| Post-pandemic year 2022 | -1.40 | -2.33; -0.46 | -2.93 | 0.003 |  | -0.40 | -1.39; 0.59 | -0.79 | 0.429 |
| Low parental education | -3.29 | -3.47; -3.11 | -35.74 | <0.001 |  | -4.63 | -4.83; -4.44 | -46.88 | <0.001 |
| Female gender | -2.18 | -2.31; -2.04 | -31.74 | <0.001 |  | -2.30 | -2.44; -2.15 | -31.14 | <0.001 |
| Age | 0.25 | 0.21; 0.30 | 11.13 | <0.001 |  | -0.22 | -0.26; -0.17 | -8.93 | <0.001 |
| Variance components | | | | | | | | | |
| Individual level | 636.41 |  | | |  | 735.76 |  | | |
| Municipality-year level | 0.24 |  | | |  | 0.26 |  | | |
| Municipality level | 1.31 |  | | |  | 0.96 |  | | |
| Intraclass correlation | 0.00 |  | | |  | 0.00 |  | | |

*Note*. 95% CI = 95% confidence interval of the estimate. Due to mean centering, the intercept of the societal growth curve represents the estimated value in 2018. The linear and quadratic slopes represent change from one year to the next. The estimate of the pandemic year effects provides information about the deviation during the pandemic (in 2021) and after the pandemic (in 2022) from the overall time trends, as captured by societal growth curves. Degrees of freedom (df) for analyses conducted are: dfPeer relationships=541,692; dfParental relationships=543,402.

**Supplementary Table 2**

Results of societal growth curve analyses from 2014 to 2022 and estimated effects of the COVID-19 pandemic in 2021 (during the pandemic) and in 2022 (after the pandemic) for mental health variables

|  | Depressive symptoms | | | |  | Loneliness | | | |
| --- | --- | --- | --- | --- | --- | --- | --- | --- | --- |
|  | Estimate | 95% CI | *t* | *P* |  | Estimate | 95% CI | *t* | *P* |
| Intercept | 36.07 | 35.60; 36.53 | 151.55 | <0.001 |  | 27.86 | 27.34; 28.37 | 106.41 | <0.001 |
| Linear slope | 0.38 | 0.19; 0.57 | 3.92 | <0.001 |  | 0.81 | 0.59; 1.04 | 7.12 | <0.001 |
| Quadratic slope | -0.18 | -0.23; -0.13 | -6.81 | <0.001 |  | -0.03 | -0.09; 0.03 | -1.04 | 0.299 |
| Pandemic year 2021 | 1.84 | 1.01; 2.67 | 4.36 | <0.001 |  | 0.51 | -0.46; 1.49 | 1.03 | 0.301 |
| Post-pandemic year 2022 | 1.07 | -0.21; 2.35 | 1.64 | 0.101 |  | -2.25 | -3.76; -0.75 | -2.94 | 0.003 |
| Low parental education | 2.26 | 2.08; 2.44 | 25.03 | <0.001 |  | 3.82 | 3.59; 4.05 | 32.43 | <0.001 |
| Female gender | 16.76 | 16.63; 16.89 | 248.92 | <0.001 |  | 14.35 | 14.17; 14.52 | 163.18 | <0.001 |
| Age | 2.40 | 2.36; 2.45 | 106.18 | <0.001 |  | 1.51 | 1.46; 1.57 | 51.51 | <0.001 |
| Variance components | | | | | | | | | |
| Individual level | 616.39 |  | | |  | 1043.07 |  | | |
| Municipality-year level | 1.31 |  | | |  | 1.47 |  | | |
| Municipality level | 6.02 |  | | |  | 5.8 |  | | |
| Intraclass correlation | 0.01 |  | | |  | 0.01 |  | | |

*Note*. 95% CI = 95% confidence interval of the estimate. Due to mean centering, the intercept of the societal growth curve represents the estimated value in 2018. The linear and quadratic slopes represent change from one year to the next. The estimate of the pandemic year effects provides information about the deviation during the pandemic (in 2021) and after the pandemic (in 2022) from the overall time trends, as captured by societal growth curves. Degrees of freedom (df) for analyses conducted are: dfDepressive symptoms=545,822; dfLoneliness= 541,888.

**Supplementary Table 3**

Results of societal growth curve analyses from 2014 to 2022 and estimated effects of the COVID-19 pandemic in 2021 (during the pandemic) and in 2022 (after the pandemic) for substance use variables

|  | Smoking | | | |  | Alcohol use | | | |
| --- | --- | --- | --- | --- | --- | --- | --- | --- | --- |
|  | Estimate | 95% CI | *t* | *P* |  | Estimate | 95% CI | *t* | *P* |
| Intercept | 5.07 | 4.78; 5.37 | 33.78 | <0.001 |  | 29.92 | 29.21; 30.63 | 82.58 | <0.001 |
| Linear slope | 0.10 | -0.04; 0.25 | 1.41 | 0.158 |  | 0.22 | -0.06; 0.51 | 1.56 | 0.120 |
| Quadratic slope | 0.04 | 0.00; 0.08 | 2.05 | 0.040 |  | 0.14 | 0.06; 0.22 | 3.49 | <0.001 |
| Pandemic year 2021 | -0.77 | -1.39; -0.15 | -2.44 | 0.015 |  | -1.92 | -3.15; -0.68 | -3.05 | 0.002 |
| Post-pandemic year 2022 | -0.62 | -1.58; 0.34 | -1.26 | 0.207 |  | -1.21 | -3.12; 0.70 | -1.24 | 0.215 |
| Low parental education | 1.90 | 1.78; 2.02 | 31.91 | <0.001 |  | -1.24 | -1.42; -1.06 | -13.36 | <0.001 |
| Female gender | -2.13 | -2.22; -2.05 | -47.88 | <0.001 |  | 0.10 | -0.03; 0.24 | 1.46 | 0.144 |
| Age | 1.95 | 1.92; 1.98 | 130.13 | <0.001 |  | 10.88 | 10.83; 10.92 | 460.38 | <0.001 |
| Variance components | | | | | | | | | |
| Individual level | 278.31 |  | | |  | 678.20 |  | | |
| Municipality-year level | 0.94 |  | | |  | 4.59 |  | | |
| Municipality level | 1.13 |  | | |  | 15.13 |  | | |
| Intraclass correlation | 0.01 |  | | |  | 0.03 |  | | |

*Note*. 95% CI = 95% confidence interval of the estimate. Due to mean centering, the intercept of the societal growth curve represents the estimated value in 2018. The linear and quadratic slopes represent change from one year to the next. The estimate of the pandemic year effects provides information about the deviation during the pandemic (in 2021) and after the pandemic (in 2022) from the overall time trends, as captured by societal growth curves. Degrees of freedom (df) for analyses conducted are: dfSmoking= 562,777; dfAlcohol use= 562,505.

**Supplementary Table 4**

Results of societal growth curve analyses from 2014 to 2022 and estimated effects of the COVID-19 pandemic in 2021 (during the pandemic) and in 2022 (after the pandemic) for physical activity and screen time

|  | Physical activity | | | |  | Screen time | | | |
| --- | --- | --- | --- | --- | --- | --- | --- | --- | --- |
|  | Estimate | 95% CI | *t* | *P* |  | Estimate | 95% CI | *t* | *P* |
| Intercept | 71.30 | 70.82; 71.77 | 296.38 | <0.001 |  | 66.32 | 65.89; 66.75 | 301.14 | <0.001 |
| Linear slope | -0.06 | -0.25; 0.13 | -0.62 | 0.532 |  | 1.61 | 1.43; 1.79 | 17.68 | <0.001 |
| Quadratic slope | 0.04 | -0.02; 0.09 | 1.40 | 0.163 |  | 0.03 | -0.02; 0.08 | 1.05 | 0.292 |
| Pandemic year 2021 | -0.43 | -1.25; 0.39 | -1.03 | 0.302 |  | 2.27 | 1.49; 3.05 | 5.71 | <0.001 |
| Post-pandemic year 2022 | 0.88 | -0.39; 2.15 | 1.36 | 0.174 |  | -0.68 | -1.88; 0.53 | -1.10 | 0.271 |
| Low parental education | -7.83 | -8.00; -7.66 | -90.35 | <0.001 |  | 1.97 | 1.81; 2.13 | 24.37 | <0.001 |
| Female gender | -5.86 | -5.98; -5.73 | -90.50 | <0.001 |  | -1.72 | -1.84; -1.61 | -28.56 | <0.001 |
| Age | -0.91 | -0.96; -0.87 | -41.97 | <0.001 |  | 0.96 | 0.92; 1.00 | 47.28 | <0.001 |
| Variance components | | | | | | | | | |
| Individual level | 575.62 |  | | |  | 499.10 |  | | |
| Municipality-year level | 1.34 |  | | |  | 1.25 |  | | |
| Municipality level | 6.43 |  | | |  | 4.95 |  | | |
| Intraclass correlation | 0.01 |  | | |  | 0.01 |  | | |

*Note*. 95% CI = 95% confidence interval of the estimate. Due to mean centering, the intercept of the societal growth curve represents the estimated value in 2018. The linear and quadratic slopes represent change from one year to the next. The estimate of the pandemic year effects provides information about the deviation during the pandemic (in 2021) and after the pandemic (in 2022) from the overall time trends, as captured by societal growth curves. Degrees of freedom (df) for analyses conducted are: dfPhysical activity=552,115; dfScreen time=550,489.

**Supplementary Table 5**

Results of societal growth curve analyses from 2014 to 2022 and estimated effects of the COVID-19 pandemic in 2021 (during the pandemic) and in 2022 (after the pandemic) for expecting a happy future

|  | Estimate | 95% CI | *t* | *P* |
| --- | --- | --- | --- | --- |
| Intercept | 69.24 | 68.62; 69.86 | 218.14 | <0.001 |
| Linear slope | -0.16 | -0.44; 0.12 | -1.15 | 0.249 |
| Quadratic slope | 0.27 | 0.19; 0.34 | 6.80 | <0.001 |
| Pandemic year 2021 | -2.09 | -3.31; -0.87 | -3.36 | 0.001 |
| Post-pandemic year 2022 | -2.97 | -4.84; -1.10 | -3.11 | 0.002 |
| Low parental education | -6.07 | -6.39; -5.75 | -36.86 | <0.001 |
| Female gender | -6.01 | -6.25; -5.77 | -48.90 | <0.001 |
| Age | -0.84 | -0.92; -0.76 | -20.49 | <0.001 |
| Variance components | | | | |
| Individual level | 2052.71 |  | | |
| Municipality-year level | 1.61 |  | | |
| Municipality level | 7.45 |  | | |
| Intraclass correlation | 0.00 |  | | |

*Note*. 95% CI = 95% confidence interval of the estimate. Due to mean centering, the intercept of the societal growth curve represents the estimated value in 2018. The linear and quadratic slopes represent change from one year to the next. The estimate of the pandemic year effects provides information about the deviation during the pandemic (in 2021) and after the pandemic (in 2022) from the overall time trends, as captured by societal growth curves. Degrees of freedom (df) for the analysis conducted are df=545,243.

**Supplementary Table 6**

Results of multilevel interaction analyses examining how estimated effects of the COVID-19 pandemic in 2021 (during the pandemic) and in 2022 (after the pandemic) vary according to parental education, perceived family poverty, female gender, and age for social relationship variables

|  | Peer relationships | | | |  | Parental relationships | | | |
| --- | --- | --- | --- | --- | --- | --- | --- | --- | --- |
|  | Estimate | 95% CI | *t* | *P* |  | Estimate | 95% CI | *t* | *P* |
| Intercept | 84.59 | 84.30; 84.88 | 571.24 | <0.001 |  | 85.63 | 85.35; 85.92 | 589.16 | <0.001 |
| Linear slope | -0.14 | -0.28; -0.00 | -2.00 | 0.045 |  | 0.27 | 0.12; 0.41 | 3.64 | <0.001 |
| Quadratic slope | 0.01 | -0.02; 0.05 | 0.76 | 0.444 |  | 0.02 | -0.02; 0.06 | 1.05 | 0.295 |
| Pandemic year 2021 | -0.72 | -1.32; -0.12 | -2.36 | 0.018 |  | -0.49 | -1.11; 0.13 | -1.55 | 0.122 |
| Post-pandemic year 2022 | -1.59 | -2.50; -0.67 | -3.40 | 0.001 |  | -0.65 | -1.60; 0.30 | -1.35 | 0.177 |
| Low parental education | -2.52 | -2.70; -2.34 | -27.15 | <0.001 |  | -3.23 | -3.42; -3.04 | -32.75 | <0.001 |
| Perceived family poverty | -11.11 | -11.43; -10.79 | -67.84 | <0.001 |  | -19.88 | -20.22; -19.54 | -113.98 | <0.001 |
| Female gender | -2.06 | -2.19; -1.93 | -30.12 | <0.001 |  | -2.08 | -2.22; -1.94 | -28.55 | <0.001 |
| Age | 0.30 | 0.26; 0.35 | 13.52 | <0.001 |  | -0.12 | -0.17; -0.07 | -4.99 | <0.001 |
| Low parental education × pandemic year 2021 | -0.63 | -1.10; -0.16 | -2.62 | 0.009 |  | -0.61 | -1.11; -0.11 | -2.38 | 0.017 |
| Perceived family poverty × pandemic year 2021 | -1.35 | -2.21; -0.49 | -3.08 | 0.002 |  | -1.79 | -2.70; -0.87 | -3.82 | <0.001 |
| Female gender × pandemic year 2021 | -1.39 | -1.73; -1.06 | -8.09 | <0.001 |  | -2.82 | -3.18; -2.46 | -15.37 | <0.001 |
| Age × pandemic year 2021 | 0.24 | 0.13; 0.35 | 4.34 | <0.001 |  | 0.27 | 0.16; 0.39 | 4.64 | <0.001 |
| Low parental education × post-pandemic year 2022 | -0.48 | -1.05; 0.08 | -1.67 | 0.095 |  | -0.53 | -1.14; 0.07 | -1.74 | 0.082 |
| Perceived family poverty × post-pandemic year 2022 | -1.78 | -2.83; -0.72 | -3.31 | 0.001 |  | -2.37 | -3.49; -1.25 | -4.15 | <0.001 |
| Female gender × post-pandemic year 2022 | -2.03 | -2.43; -1.63 | -9.90 | <0.001 |  | -2.90 | -3.33; -2.47 | -13.30 | <0.001 |
| Age × post-pandemic year 2022 | 0.23 | 0.10; 0.36 | 3.39 | 0.001 |  | 0.03 | -0.11; 0.17 | 0.46 | 0.644 |

*Note*. 95% CI = 95% confidence interval of the estimate. The estimates of the interaction effects provide information about the deviation during the pandemic (in 2021) and after the pandemic (in 2022) from the overall time trends, as captured by societal growth curves for adolescents with a specific characteristic (such as low parental education) compared to other adolescents; see Figures 2–5 for graphical displays of the results. Degrees of freedom (df) for analyses conducted are: dfPeer relationships= 541,683; dfParental relationships=543,393.

**Supplementary Table 7**

Results of multilevel interaction analyses examining how estimated effects of the COVID-19 pandemic in 2021 (during the pandemic) and in 2022 (after the pandemic) vary according to parental education, perceived family poverty, female gender, and age for mental health variables

|  | Depressive symptoms | | | |  | Loneliness | | | |
| --- | --- | --- | --- | --- | --- | --- | --- | --- | --- |
|  | Estimate | 95% CI | *t* | *P* |  | Estimate | 95% CI | *t* | *P* |
| Intercept | 36.18 | 35.73; 36.63 | 156.2 | <0.001 |  | 27.96 | 27.47; 28.46 | 110.84 | <0.001 |
| Linear slope | 0.33 | 0.15; 0.52 | 3.50 | <0.001 |  | 0.77 | 0.56; 0.99 | 7.01 | <0.001 |
| Quadratic slope | -0.19 | -0.24; -0.14 | -7.34 | <0.001 |  | -0.04 | -0.10; 0.02 | -1.39 | 0.165 |
| Pandemic year 2021 | 2.28 | 1.46; 3.09 | 5.49 | <0.001 |  | 0.98 | 0.04; 1.93 | 2.04 | 0.041 |
| Post-pandemic year 2022 | 1.58 | 0.33; 2.84 | 2.47 | 0.014 |  | -1.73 | -3.19; -0.28 | -2.34 | 0.019 |
| Low parental education | 0.90 | 0.73; 1.08 | 10.05 | <0.001 |  | 2.25 | 2.02; 2.48 | 19.07 | <0.001 |
| Perceived family poverty | 18.92 | 18.61; 19.23 | 119.44 | <0.001 |  | 21.75 | 21.34; 22.15 | 104.73 | <0.001 |
| Female gender | 16.56 | 16.43; 16.69 | 249.11 | <0.001 |  | 14.11 | 13.94; 14.28 | 162.15 | <0.001 |
| Age | 2.33 | 2.29; 2.38 | 104.26 | <0.001 |  | 1.43 | 1.37; 1.48 | 49.04 | <0.001 |
| Low parental education × pandemic year 2021 | 1.01 | 0.56; 1.47 | 4.37 | <0.001 |  | 0.51 | -0.08; 1.11 | 1.69 | 0.091 |
| Perceived family poverty × pandemic year 2021 | 1.65 | 0.82; 2.47 | 3.90 | <0.001 |  | 1.42 | 0.34; 2.51 | 2.57 | 0.010 |
| Female gender × pandemic year 2021 | 0.70 | 0.38; 1.03 | 4.22 | <0.001 |  | -0.65 | -1.08; -0.22 | -2.99 | 0.003 |
| Age × pandemic year 2021 | -1.00 | -1.11; -0.89 | -18.38 | <0.001 |  | -0.95 | -1.09; -0.81 | -13.37 | <0.001 |
| Low parental education × post-pandemic year 2022 | 1.12 | 0.57; 1.66 | 4.02 | <0.001 |  | 1.05 | 0.34; 1.77 | 2.89 | 0.004 |
| Perceived family poverty × post-pandemic year 2022 | 2.76 | 1.75; 3.77 | 5.36 | <0.001 |  | 2.10 | 0.78; 3.43 | 3.11 | 0.002 |
| Female gender × post-pandemic year 2022 | 0.17 | -0.21; 0.56 | 0.88 | 0.380 |  | -1.32 | -1.82; -0.81 | -5.09 | <0.001 |
| Age × post-pandemic year 2022 | -0.69 | -0.82; -0.56 | -10.43 | <0.001 |  | -0.70 | -0.86; -0.53 | -8.12 | <0.001 |

*Note*. 95% CI = 95% confidence interval of the estimate. The estimates of the interaction effect provides information about the deviation during the pandemic (in 2021) and after the pandemic (in 2022) from the overall time trends, as captured by societal growth curves for adolescents with a specific characteristic (such as low parental education) compared to other adolescents; see Figures 2–5 for graphical displays of the results. Degrees of freedom (df) for analyses conducted are: dfDepressive symptoms= 545,813; dfLoneliness=541,879.

**Supplementary Table 8**

Results of multilevel interaction analyses examining how estimated effects of the COVID-19 pandemic in 2021 (during the pandemic) and in 2022 (after the pandemic) vary according to parental education, perceived family poverty, female gender, and age for substance use variables

|  | Smoking | | | |  | Alcohol use | | | |
| --- | --- | --- | --- | --- | --- | --- | --- | --- | --- |
|  | Estimate | 95% CI | *t* | *P* |  | Estimate | 95% CI | *t* | *P* |
| Intercept | 5.10 | 4.81; 5.39 | 34.22 | <0.001 |  | 29.94 | 29.23; 30.65 | 83.08 | <0.001 |
| Linear slope | 0.09 | -0.05; 0.23 | 1.27 | 0.206 |  | 0.21 | -0.07; 0.49 | 1.48 | 0.139 |
| Quadratic slope | 0.04 | -0.00; 0.08 | 1.90 | 0.058 |  | 0.13 | 0.06; 0.21 | 3.42 | 0.001 |
| Pandemic year 2021 | -0.65 | -1.26; -0.04 | -2.08 | 0.038 |  | -1.83 | -3.04; -0.61 | -2.95 | 0.003 |
| Post-pandemic year 2022 | -0.47 | -1.42; 0.48 | -0.96 | 0.336 |  | -1.06 | -2.95; 0.83 | -1.10 | 0.271 |
| Low parental education | 1.44 | 1.32; 1.55 | 23.94 | <0.001 |  | -1.61 | -1.79; -1.42 | -17.12 | <0.001 |
| Perceived family poverty | 6.42 | 6.21; 6.63 | 60.81 | <0.001 |  | 4.94 | 4.62; 5.27 | 29.88 | <0.001 |
| Female gender | -2.20 | -2.29; -2.11 | -49.49 | <0.001 |  | 0.06 | -0.08; 0.19 | 0.80 | 0.423 |
| Age | 1.92 | 1.89; 1.95 | 128.72 | <0.001 |  | 10.86 | 10.81; 10.91 | 459.75 | <0.001 |
| Low parental education × pandemic year 2021 | 0.02 | -0.28; 0.33 | 0.15 | 0.878 |  | -0.37 | -0.85; 0.10 | -1.53 | 0.125 |
| Perceived family poverty × pandemic year 2021 | 0.58 | 0.03; 1.14 | 2.06 | 0.040 |  | 0.61 | -0.26; 1.48 | 1.38 | 0.168 |
| Female gender × pandemic year 2021 | 0.70 | 0.48; 0.92 | 6.23 | <0.001 |  | 2.10 | 1.75; 2.44 | 11.95 | <0.001 |
| Age × pandemic year 2021 | -0.43 | -0.50; -0.35 | -11.60 | <0.001 |  | -0.58 | -0.70; -0.47 | -10.07 | <0.001 |
| Low parental education × post-pandemic year 2022 | 0.29 | -0.07; 0.66 | 1.56 | 0.119 |  | -0.37 | -0.94; 0.20 | -1.26 | 0.208 |
| Perceived family poverty × post-pandemic year 2022 | 1.58 | 0.90; 2.25 | 4.57 | <0.001 |  | 1.26 | 0.21; 2.32 | 2.34 | 0.019 |
| Female gender × post-pandemic year 2022 | 1.23 | 0.97; 1.49 | 9.25 | <0.001 |  | 3.88 | 3.47; 4.29 | 18.66 | <0.001 |
| Age × post-pandemic year 2022 | -0.01 | -0.10; 0.07 | -0.28 | 0.778 |  | 0.17 | 0.03; 0.31 | 2.45 | 0.014 |

*Note*. 95% CI = 95% confidence interval of the estimate. The estimates of the interaction effects provide information about the deviation during the pandemic (in 2021) and after the pandemic (in 2022) from the overall time trends, as captured by societal growth curves for adolescents with a specific characteristic (such as low parental education) compared to other adolescents; see Figures 2–5 for graphical displays of the results. Degrees of freedom (df) for analyses conducted are: dfSmoking=562,768; dfAlcohol use=562,496.

**Supplementary Table 9**

Results of multilevel interaction analyses examining how estimated effects of the COVID-19 pandemic in 2021 (during the pandemic) and in 2022 (after the pandemic) vary according to parental education, perceived family poverty, female gender, and age for physical activity and screen time

|  | Physical activity | | | |  | Screen time | | | |
| --- | --- | --- | --- | --- | --- | --- | --- | --- | --- |
|  | Estimate | 95% CI | *t* | *P* |  | Estimate | 95% CI | *t* | *P* |
| Intercept | 71.26 | 70.79; 71.73 | 298.53 | <0.001 |  | 66.33 | 65.90; 66.75 | 304.22 | <0.001 |
| Linear slope | -0.05 | -0.23; 0.14 | -0.51 | 0.612 |  | 1.61 | 1.43; 1.78 | 17.73 | <0.001 |
| Quadratic slope | 0.04 | -0.01; 0.09 | 1.52 | 0.128 |  | 0.02 | -0.02; 0.07 | 0.97 | 0.334 |
| Pandemic year 2021 | -0.58 | -1.39; 0.24 | -1.39 | 0.164 |  | 2.34 | 1.57; 3.11 | 5.93 | <0.001 |
| Post-pandemic year 2022 | 0.74 | -0.52; 1.99 | 1.15 | 0.249 |  | -0.59 | -1.79; 0.60 | -0.97 | 0.331 |
| Low parental education | -7.36 | -7.53; -7.19 | -84.18 | <0.001 |  | 1.56 | 1.40; 1.72 | 19.10 | <0.001 |
| Perceived family poverty | -6.72 | -7.03; -6.42 | -43.65 | <0.001 |  | 5.12 | 4.83; 5.40 | 35.55 | <0.001 |
| Female gender | -5.78 | -5.91; -5.66 | -89.53 | <0.001 |  | -1.77 | -1.89; -1.66 | -29.44 | <0.001 |
| Age | -0.88 | -0.93; -0.84 | -40.67 | <0.001 |  | 0.94 | 0.90; 0.98 | 46.14 | <0.001 |
| Low parental education × pandemic year 2021 | -0.68 | -1.12; -0.24 | -3.00 | 0.003 |  | -1.53 | -1.94; -1.12 | -7.24 | <0.001 |
| Perceived family poverty × pandemic year 2021 | -1.69 | -2.50; -0.88 | -4.10 | <0.001 |  | -1.03 | -1.79; -0.27 | -2.67 | 0.008 |
| Female gender × pandemic year 2021 | -0.98 | -1.30; -0.66 | -6.05 | <0.001 |  | 3.16 | 2.86; 3.46 | 20.8 | <0.001 |
| Age × pandemic year 2021 | 0.28 | 0.18; 0.38 | 5.25 | <0.001 |  | -0.37 | -0.47; -0.27 | -7.39 | <0.001 |
| Low parental education × post-pandemic year 2022 | 0.03 | -0.51; 0.56 | 0.10 | 0.920 |  | -0.92 | -1.42; -0.42 | -3.60 | <0.001 |
| Perceived family poverty × post-pandemic year 2022 | -0.16 | -1.14; 0.83 | -0.31 | 0.756 |  | -0.96 | -1.88; -0.03 | -2.03 | 0.043 |
| Female gender × post-pandemic year 2022 | -2.58 | -2.96; -2.20 | -13.37 | <0.001 |  | 3.67 | 3.32; 4.03 | 20.35 | <0.001 |
| Age × post-pandemic year 2022 | 0.25 | 0.13; 0.38 | 3.92 | <0.001 |  | 0.04 | -0.08; 0.16 | 0.63 | 0.530 |

*Note*. 95% CI = 95% confidence interval of the estimate. The estimates of the interaction effects provide information about the deviation during the pandemic (in 2021) and after the pandemic (in 2022) from the overall time trends, as captured by societal growth curves for adolescents with a specific characteristic (such as low parental education) compared to other adolescents; see Figures 2–5 for graphical displays of the results. Degrees of freedom (df) for analyses conducted are: dfPhysical activity= 552,106; dfScreen time=550,480.

**Supplementary Table 10**

Results of multilevel interaction analyses examining how estimated effects of the COVID-19 pandemic in 2021 (during the pandemic) and in 2022 (after the pandemic) vary according to parental education, perceived family poverty, female gender, and age for expecting a happy future

|  | Estimate | 95% CI | *t* | *P* |
| --- | --- | --- | --- | --- |
| Intercept | 69.10 | 68.51; 69.69 | 227.66 | <0.001 |
| Linear slope | -0.11 | -0.38; 0.16 | -0.81 | 0.420 |
| Quadratic slope | 0.28 | 0.21; 0.35 | 7.48 | <0.001 |
| Pandemic year 2021 | -2.70 | -3.86; -1.53 | -4.53 | <0.001 |
| Post-pandemic year 2022 | -3.65 | -5.44; -1.87 | -4.01 | <0.001 |
| Low parental education | -4.27 | -4.59; -3.94 | -25.80 | <0.001 |
| Perceived family poverty | -24.70 | -25.27; -24.12 | -84.48 | <0.001 |
| Female gender | -5.75 | -5.99; -5.51 | -47.04 | <0.001 |
| Age | -0.73 | -0.80; -0.65 | -17.95 | <0.001 |
| Low parental education × pandemic year 2021 | -0.46 | -1.30; 0.38 | -1.07 | 0.284 |
| Perceived family poverty × pandemic year 2021 | -1.59 | -3.13; -0.05 | -2.02 | 0.043 |
| Female gender × pandemic year 2021 | 0.03 | -0.57; 0.63 | 0.10 | 0.924 |
| Age × pandemic year 2021 | 1.31 | 1.12; 1.51 | 13.17 | <0.001 |
| Low parental education × post-pandemic year 2022 | -0.02 | -1.03; 1.00 | -0.03 | 0.977 |
| Perceived family poverty × post-pandemic year 2022 | -2.92 | -4.80; -1.03 | -3.03 | 0.002 |
| Female gender × post-pandemic year 2022 | 0.31 | -0.41; 1.03 | 0.84 | 0.402 |
| Age × post-pandemic year 2022 | 1.25 | 1.02; 1.49 | 10.37 | <0.001 |

*Note*. 95% CI = 95% confidence interval of the estimate. The estimates of the interaction effects provide information about the deviation during the pandemic (in 2021) and after the pandemic (in 2022) from the overall time trends, as captured by societal growth curves for adolescents with a specific characteristic (such as low parental education) compared to other adolescents; see Figures 2–5 for graphical displays of the results. Degrees of freedom (df) for the analysis conducted are df= 545,234.

**Supplementary Table 11**

Results of multilevel interaction analyses examining how estimated effects of the COVID-19 pandemic in 2021 (during the pandemic) and in 2022 (after the pandemic) vary according to municipality characteristics (share of citizens with low education, share of households with low income, municipality Gini coefficient and share of migrants) for social relationship variables

|  | Peer relationships | | | |  | Parental relationships | | | |
| --- | --- | --- | --- | --- | --- | --- | --- | --- | --- |
|  | Estimate | 95% CI | *t* | *P* |  | Estimate | 95% CI | *t* | *P* |
| Intercept | 84.44 | 84.12; 84.76 | 517.24 | <0.001 |  | 85.50 | 85.19; 85.80 | 545.23 | <0.001 |
| Linear slope | -0.15 | -0.28; -0.01 | -2.15 | 0.032 |  | 0.26 | 0.12; 0.40 | 3.61 | <0.001 |
| Quadratic slope | 0.01 | -0.02; 0.05 | 0.70 | 0.481 |  | 0.02 | -0.02; 0.06 | 1.01 | 0.311 |
| Pandemic year 2021 | -0.84 | -1.46; -0.22 | -2.66 | 0.008 |  | -0.54 | -1.18; 0.10 | -1.65 | 0.100 |
| Post-pandemic year 2022 | -1.35 | -2.27; -0.43 | -2.88 | 0.004 |  | -0.39 | -1.34; 0.57 | -0.79 | 0.429 |
| Low parental education | -2.50 | -2.68; -2.32 | -27.00 | <0.001 |  | -3.21 | -3.40; -3.01 | -32.55 | <0.001 |
| Perceived family poverty | -11.00 | -11.32; -10.68 | -68.05 | <0.001 |  | -19.72 | -20.06; -19.39 | -114.58 | <0.001 |
| Female gender | -2.05 | -2.19; -1.92 | -30.04 | <0.001 |  | -2.07 | -2.22; -1.93 | -28.45 | <0.001 |
| Age | 0.30 | 0.26; 0.34 | 13.38 | <0.001 |  | -0.12 | -0.17; -0.08 | -5.14 | <0.001 |
| % low educated | -7.52 | -11.70; -3.34 | -3.53 | <0.001 |  | -5.69 | -9.58; -1.80 | -2.87 | 0.004 |
| % low income | 23.11 | 13.65; 32.58 | 4.79 | <0.001 |  | 19.59 | 10.97; 28.21 | 4.45 | <0.001 |
| Gini coefficient | 0.85 | -10.21; 11.91 | 0.15 | 0.881 |  | -2.34 | -12.44; 7.77 | -0.45 | 0.651 |
| % migrants | -12.85 | -17.59; -8.11 | -5.31 | <0.001 |  | -9.39 | -13.69; -5.10 | -4.29 | <0.001 |
| % low educated × pandemic year 2021 | -0.35 | -6.56; 5.86 | -0.11 | 0.912 |  | 2.49 | -3.98; 8.97 | 0.75 | 0.451 |
| % low income × pandemic year 2021 | 18.42 | 2.42; 34.42 | 2.26 | 0.024 |  | 3.65 | -12.92; 20.22 | 0.43 | 0.666 |
| Gini coefficient × pandemic year 2021 | -1.77 | -22.43; 18.89 | -0.17 | 0.867 |  | -0.13 | -21.42; 21.15 | -0.01 | 0.990 |
| % migrants × pandemic year 2021 | -2.42 | -11.23; 6.39 | -0.54 | 0.590 |  | 0.89 | -8.17; 9.94 | 0.19 | 0.848 |
| % low educated × post-pandemic year 2022 | -0.95 | -10.64; 8.73 | -0.19 | 0.847 |  | 2.19 | -7.82; 12.21 | 0.43 | 0.668 |
| % low income × post-pandemic year 2022 | 12.76 | -3.04; 28.55 | 1.58 | 0.113 |  | 9.57 | -6.77; 25.91 | 1.15 | 0.251 |
| Gini coefficient × post-pandemic year 2022 | -4.09 | -22.01; 13.83 | -0.45 | 0.655 |  | 11.09 | -7.36; 29.54 | 1.18 | 0.239 |
| % migrants × post-pandemic year 2022 | -3.08 | -9.76; 3.60 | -0.90 | 0.367 |  | -7.64 | -14.55; -0.73 | -2.17 | 0.030 |

*Note*. 95% CI = 95% confidence interval of the estimate. The estimates of the interaction effects provide information to which degree the deviation during the pandemic (in 2021) and after the pandemic (in 2022) from the overall time trends, as captured by societal growth curves varies according to municipality level characteristics (such as share of low-educated people in the municipality). Degrees of freedom (df) for analyses conducted are: dfPeer relationships= 541,679; dfParental relationships= 543,389.

**Supplementary Table 12**

Results of multilevel interaction analyses examining how estimated effects of the COVID-19 pandemic in 2021 (during the pandemic) and in 2022 (after the pandemic) vary according to municipality characteristics (share of citizens with low education, share of households with low income, municipality Gini coefficient and share of migrants) for mental health variables

|  | Depressive symptoms | | | |  | Loneliness | | | |
| --- | --- | --- | --- | --- | --- | --- | --- | --- | --- |
|  | Estimate | 95% CI | *t* | *P* |  | Estimate | 95% CI | *t* | *P* |
| Intercept | 36.98 | 36.44; 37.52 | 134.05 | <0.001 |  | 28.19 | 27.61; 28.76 | 95.98 | <0.001 |
| Linear slope | 0.40 | 0.22; 0.58 | 4.29 | <0.001 |  | 0.83 | 0.61; 1.04 | 7.57 | <0.001 |
| Quadratic slope | -0.18 | -0.23; -0.13 | -7.16 | <0.001 |  | -0.04 | -0.09; 0.02 | -1.17 | 0.244 |
| Pandemic year 2021 | 1.92 | 1.04; 2.79 | 4.30 | <0.001 |  | 1.04 | 0.02; 2.06 | 2.00 | 0.045 |
| Post-pandemic year 2022 | 1.24 | -0.02; 2.51 | 1.92 | 0.054 |  | -2.07 | -3.55; -0.58 | -2.73 | 0.006 |
| Low parental education | 0.89 | 0.72; 1.07 | 9.95 | <0.001 |  | 2.25 | 2.02; 2.48 | 19.09 | <0.001 |
| Perceived family poverty | 18.79 | 18.49; 19.10 | 119.91 | <0.001 |  | 21.66 | 21.25; 22.06 | 105.42 | <0.001 |
| Female gender | 16.55 | 16.42; 16.68 | 248.93 | <0.001 |  | 14.10 | 13.93; 14.27 | 161.99 | <0.001 |
| Age | 2.31 | 2.27; 2.36 | 103.51 | <0.001 |  | 1.41 | 1.35; 1.47 | 48.59 | <0.001 |
| % low educated | 13.21 | 6.07; 20.36 | 3.62 | <0.001 |  | 21.07 | 13.59; 28.55 | 5.52 | <0.001 |
| % low income | -33.70 | -50.70; -16.70 | -3.88 | <0.001 |  | -51.80 | -69.33; -34.27 | -5.79 | <0.001 |
| Gini coefficient | 23.28 | 3.36; 43.20 | 2.29 | 0.022 |  | 16.92 | -3.58; 37.41 | 1.62 | 0.106 |
| % migrants | 20.30 | 11.64; 28.96 | 4.59 | <0.001 |  | 18.31 | 9.42; 27.20 | 4.04 | <0.001 |
| % low educated × pandemic year 2021 | -8.31 | -16.28; -0.35 | -2.05 | 0.041 |  | -2.51 | -12.00; 6.99 | -0.52 | 0.605 |
| % low income × pandemic year 2021 | -6.62 | -27.51; 14.27 | -0.62 | 0.535 |  | -20.20 | -44.94; 4.55 | -1.60 | 0.110 |
| Gini coefficient × pandemic year 2021 | 4.83 | -22.52; 32.18 | 0.35 | 0.729 |  | 13.54 | -18.83; 45.91 | 0.82 | 0.412 |
| % migrants × pandemic year 2021 | -9.74 | -21.84; 2.37 | -1.58 | 0.115 |  | -2.17 | -16.35; 12.02 | -0.30 | 0.765 |
| % low educated × post-pandemic year 2022 | -7.00 | -20.61; 6.61 | -1.01 | 0.314 |  | -2.48 | -18.29; 13.33 | -0.31 | 0.759 |
| % low income × post-pandemic year 2022 | 14.43 | -9.25; 38.11 | 1.19 | 0.232 |  | -7.40 | -34.48; 19.68 | -0.54 | 0.592 |
| Gini coefficient × post-pandemic year 2022 | -6.54 | -33.85; 20.77 | -0.47 | 0.639 |  | 10.39 | -20.84; 41.62 | 0.65 | 0.514 |
| % migrants × post-pandemic year 2022 | -4.56 | -14.46; 5.34 | -0.90 | 0.367 |  | 0.56 | -10.78; 11.91 | 0.10 | 0.922 |

*Note*. 95% CI = 95% confidence interval of the estimate. The estimates of the interaction effects provide information to which degree the deviation during the pandemic (in 2021) and after the pandemic (in 2022) from the overall time trends, as captured by societal growth curves varies according to municipality level characteristics (such as share of low-educated people in the municipality). Degrees of freedom (df) for analyses conducted are: dfDepressive symptoms= 545,809; df Loneliness= 541,875.

**Supplementary Table 13**

Results of multilevel interaction analyses examining how estimated effects of the COVID-19 pandemic in 2021 (during the pandemic) and in 2022 (after the pandemic) vary according to municipality characteristics (share of citizens with low education, share of households with low income, municipality Gini coefficient and share of migrants) for substance use variables

|  | Smoking | | | |  | Alcohol use | | | |
| --- | --- | --- | --- | --- | --- | --- | --- | --- | --- |
|  | Estimate | 95% CI | *t* | *P* |  | Estimate | 95% CI | *t* | *P* |
| Intercept | 5.13 | 4.80; 5.47 | 29.94 | <0.001 |  | 28.89 | 27.95; 29.83 | 60.26 | <0.001 |
| Linear slope | 0.11 | -0.03; 0.25 | 1.56 | 0.119 |  | 0.24 | -0.04; 0.52 | 1.71 | 0.088 |
| Quadratic slope | 0.04 | 0.00; 0.08 | 2.14 | 0.032 |  | 0.14 | 0.06; 0.22 | 3.57 | <0.001 |
| Pandemic year 2021 | -1.01 | -1.67; -0.35 | -2.98 | 0.003 |  | -2.01 | -3.38; -0.64 | -2.88 | 0.004 |
| Post-pandemic year 2022 | -0.81 | -1.77; 0.16 | -1.64 | 0.102 |  | -1.53 | -3.51; 0.44 | -1.52 | 0.127 |
| Low parental education | 1.44 | 1.32; 1.55 | 23.99 | <0.001 |  | -1.60 | -1.78; -1.42 | -17.07 | <0.001 |
| Perceived family poverty | 6.35 | 6.15; 6.56 | 60.89 | <0.001 |  | 4.88 | 4.56; 5.20 | 29.86 | <0.001 |
| Female gender | -2.20 | -2.29; -2.12 | -49.59 | <0.001 |  | 0.05 | -0.09; 0.18 | 0.69 | 0.490 |
| Age | 1.92 | 1.89; 1.95 | 128.54 | <0.001 |  | 10.85 | 10.81; 10.90 | 459.52 | <0.001 |
| % low educated | 8.58 | 4.55; 12.61 | 4.17 | <0.001 |  | 6.34 | -6.16; 18.83 | 0.99 | 0.320 |
| % low income | -16.62 | -26.04; -7.19 | -3.46 | 0.001 |  | 10.57 | -19.72; 40.86 | 0.68 | 0.494 |
| Gini coefficient | 16.40 | 5.34; 27.45 | 2.91 | 0.004 |  | 10.41 | -25.26; 46.09 | 0.57 | 0.567 |
| % migrants | 0.60 | -4.19; 5.39 | 0.25 | 0.806 |  | -25.67 | -41.14; -10.20 | -3.25 | 0.001 |
| % low educated × pandemic year 2021 | -1.35 | -7.28; 4.57 | -0.45 | 0.655 |  | -3.00 | -14.73; 8.73 | -0.50 | 0.616 |
| % low income × pandemic year 2021 | 22.94 | 7.44; 38.44 | 2.90 | 0.004 |  | 24.90 | -6.39; 56.19 | 1.56 | 0.119 |
| Gini coefficient × pandemic year 2021 | -4.46 | -24.56; 15.63 | -0.44 | 0.663 |  | 7.77 | -32.87; 48.40 | 0.37 | 0.708 |
| % migrants × pandemic year 2021 | -7.08 | -16.07; 1.90 | -1.54 | 0.122 |  | -7.92 | -26.27; 10.43 | -0.85 | 0.398 |
| % low educated × post-pandemic year 2022 | 3.36 | -6.89; 13.60 | 0.64 | 0.521 |  | 13.78 | -7.43; 34.98 | 1.27 | 0.203 |
| % low income × post-pandemic year 2022 | 4.75 | -13.54; 23.04 | 0.51 | 0.611 |  | 8.61 | -29.89; 47.10 | 0.44 | 0.661 |
| Gini coefficient × post-pandemic year 2022 | -2.29 | -23.28; 18.71 | -0.21 | 0.831 |  | 24.88 | -19.23; 68.98 | 1.11 | 0.269 |
| % migrants × post-pandemic year 2022 | -6.16 | -13.82; 1.50 | -1.58 | 0.115 |  | -24.69 | -40.89; -8.48 | -2.99 | 0.003 |

*Note*. 95% CI = 95% confidence interval of the estimate. The estimates of the interaction effects provide information to which degree the deviation during the pandemic (in 2021) and after the pandemic (in 2022) from the overall time trends, as captured by societal growth curves varies according to municipality level characteristics (such as share of low-educated people in the municipality). Degrees of freedom (df) for analyses conducted are: dfSmoking=562,764; dfAlcohol use=562,492.

**Supplementary Table 14**

Results of multilevel interaction analyses examining how estimated effects of the COVID-19 pandemic in 2021 (during the pandemic) and in 2022 (after the pandemic) vary according to municipality characteristics (share of citizens with low education, share of households with low income, municipality Gini coefficient, and share of migrants) for physical activity and screen time

|  | Physical activity | | | |  | Screen time | | | |
| --- | --- | --- | --- | --- | --- | --- | --- | --- | --- |
|  | Estimate | 95% CI | *t* | *P* |  | Estimate | 95% CI | *t* | *P* |
| Intercept | 71.56 | 70.99; 72.14 | 243.04 | <0.001 |  | 65.77 | 65.25; 66.29 | 248.64 | <0.001 |
| Linear slope | -0.06 | -0.24; 0.13 | -0.62 | 0.537 |  | 1.61 | 1.44; 1.78 | 18.19 | <0.001 |
| Quadratic slope | 0.04 | -0.01; 0.09 | 1.52 | 0.128 |  | 0.03 | -0.02; 0.07 | 1.04 | 0.298 |
| Pandemic year 2021 | -0.60 | -1.49; 0.30 | -1.30 | 0.193 |  | 2.67 | 1.83; 3.51 | 6.24 | <0.001 |
| Post-pandemic year 2022 | 0.85 | -0.46; 2.15 | 1.27 | 0.203 |  | -0.21 | -1.42; 1.01 | -0.33 | 0.740 |
| Low parental education | -7.35 | -7.52; -7.18 | -84.21 | <0.001 |  | 1.58 | 1.42; 1.74 | 19.45 | <0.001 |
| Perceived family poverty | -6.65 | -6.95; -6.35 | -43.71 | <0.001 |  | 5.19 | 4.91; 5.47 | 36.55 | <0.001 |
| Female gender | -5.78 | -5.91; -5.65 | -89.48 | <0.001 |  | -1.78 | -1.90; -1.66 | -29.55 | <0.001 |
| Age | -0.88 | -0.92; -0.84 | -40.57 | <0.001 |  | 0.94 | 0.90; 0.98 | 46.33 | <0.001 |
| % low educated | -26.61 | -34.29; -18.93 | -6.79 | <0.001 |  | 24.80 | 17.97; 31.62 | 7.12 | <0.001 |
| % low income | 6.54 | -11.82; 24.89 | 0.70 | 0.485 |  | -15.78 | -32.05; 0.48 | -1.90 | 0.057 |
| Gini coefficient | -15.21 | -36.73; 6.32 | -1.38 | 0.166 |  | -2.41 | -21.48; 16.65 | -0.25 | 0.804 |
| % migrants | -3.56 | -12.92; 5.80 | -0.75 | 0.456 |  | 6.36 | -1.93; 14.64 | 1.50 | 0.133 |
| % low educated × pandemic year 2021 | -2.39 | -10.49; 5.72 | -0.58 | 0.564 |  | -2.69 | -10.26; 4.89 | -0.69 | 0.487 |
| % low income × pandemic year 2021 | -4.37 | -25.68; 16.95 | -0.40 | 0.688 |  | -6.04 | -25.94; 13.87 | -0.59 | 0.552 |
| Gini coefficient × pandemic year 2021 | 2.67 | -25.22; 30.56 | 0.19 | 0.851 |  | -6.50 | -32.52; 19.52 | -0.49 | 0.624 |
| % migrants × pandemic year 2021 | -3.06 | -15.44; 9.33 | -0.48 | 0.629 |  | 8.46 | -3.11; 20.02 | 1.43 | 0.152 |
| % low educated × post-pandemic year 2022 | -4.86 | -18.83; 9.11 | -0.68 | 0.495 |  | -6.63 | -19.70; 6.44 | -0.99 | 0.320 |
| % low income × post-pandemic year 2022 | 3.39 | -21.08; 27.86 | 0.27 | 0.786 |  | 12.19 | -10.71; 35.10 | 1.04 | 0.297 |
| Gini coefficient × post-pandemic year 2022 | -11.63 | -39.82; 16.57 | -0.81 | 0.419 |  | 2.53 | -23.86; 28.93 | 0.19 | 0.851 |
| % migrants × post-pandemic year 2022 | 5.96 | -4.27; 16.18 | 1.14 | 0.254 |  | 7.11 | -2.47; 16.68 | 1.46 | 0.146 |

*Note*. 95% CI = 95% confidence interval of the estimate. The estimates of the interaction effects provide information to which degree the deviation during the pandemic (in 2021) and after the pandemic (in 2022) from the overall time trends, as captured by societal growth curves varies according to municipality level characteristics (such as share of low-educated people in the municipality). Degrees of freedom (df) for analyses conducted are: dfPhysical activity= 552,102; dfScreen time=550,476.

**Supplementary Table 15**

Results of multilevel interaction analyses examining how estimated effects of the COVID-19 pandemic in 2021 (during the pandemic) and in 2022 (after the pandemic) vary according to municipality characteristics (share of citizens with low education, share of households with low income, municipality Gini coefficient, and share of migrants) for expecting a happy future

|  | Estimate | 95% CI | *t* | *P* |
| --- | --- | --- | --- | --- |
| Intercept | 69.20 | 68.51; 69.90 | 195.03 | <0.001 |
| Linear slope | -0.19 | -0.46; 0.08 | -1.35 | 0.177 |
| Quadratic slope | 0.27 | 0.19; 0.34 | 7.07 | <0.001 |
| Pandemic year 2021 | -2.59 | -3.85; -1.32 | -4.01 | <0.001 |
| Post-pandemic year 2022 | -2.92 | -4.77; -1.07 | -3.09 | 0.002 |
| Low parental education | -4.28 | -4.61; -3.96 | -25.96 | <0.001 |
| Perceived family poverty | -24.57 | -25.14; -24.01 | -85.25 | <0.001 |
| Female gender | -5.74 | -5.98; -5.50 | -46.96 | <0.001 |
| Age | -0.72 | -0.80; -0.64 | -17.88 | <0.001 |
| % low educated | -22.08 | -31.19; -12.96 | -4.75 | <0.001 |
| % low income | 52.63 | 31.52; 73.73 | 4.89 | <0.001 |
| Gini coefficient | 2.53 | -22.11; 27.18 | 0.20 | 0.840 |
| % migrants | -22.26 | -32.92; -11.60 | -4.09 | <0.001 |
| % low educated × pandemic year 2021 | 0.98 | -11.21; 13.17 | 0.16 | 0.875 |
| % low income × pandemic year 2021 | 33.38 | 1.77; 64.99 | 2.07 | 0.039 |
| Gini coefficient × pandemic year 2021 | -2.31 | -43.55; 38.94 | -0.11 | 0.913 |
| % migrants × pandemic year 2021 | -3.71 | -21.52; 14.11 | -0.41 | 0.684 |
| % low educated × post-pandemic year 2022 | -6.83 | -26.54; 12.87 | -0.68 | 0.497 |
| % low income × post-pandemic year 2022 | 16.71 | -16.22; 49.64 | 0.99 | 0.320 |
| Gini coefficient × post-pandemic year 2022 | -11.14 | -48.98; 26.71 | -0.58 | 0.564 |
| % migrants × post-pandemic year 2022 | -2.86 | -16.70; 10.97 | -0.41 | 0.685 |

*Note*. 95% CI = 95% confidence interval of the estimate. The estimates of the interaction effects provide information to which degree the deviation during the pandemic (in 2021) and after the pandemic (in 2022) from the overall time trends, as captured by societal growth curves varies according to municipality level characteristics (such as share of low-educated people in the municipality). Degrees of freedom (df) for the analysis conducted are df=545,230.
